# Supplementary material for: Comparative Phytotoxicity of Metallic Elements on Duckweed Lemna gibba L. Using Growth- and Chlorophyll Fluorescence Induction-Based Endpoints
Source: MDPI journal article supplement (doi:10.3390/plants13020215), 2024-01-12

**Figure S7.** 3-parameter log-logistic concentration-response model fittings of Y(II) for the tested metals and metalloids. Circles denote individual measurements, solid lines and shaded areas denote the fitted models and the corresponding standard errors of estimates.

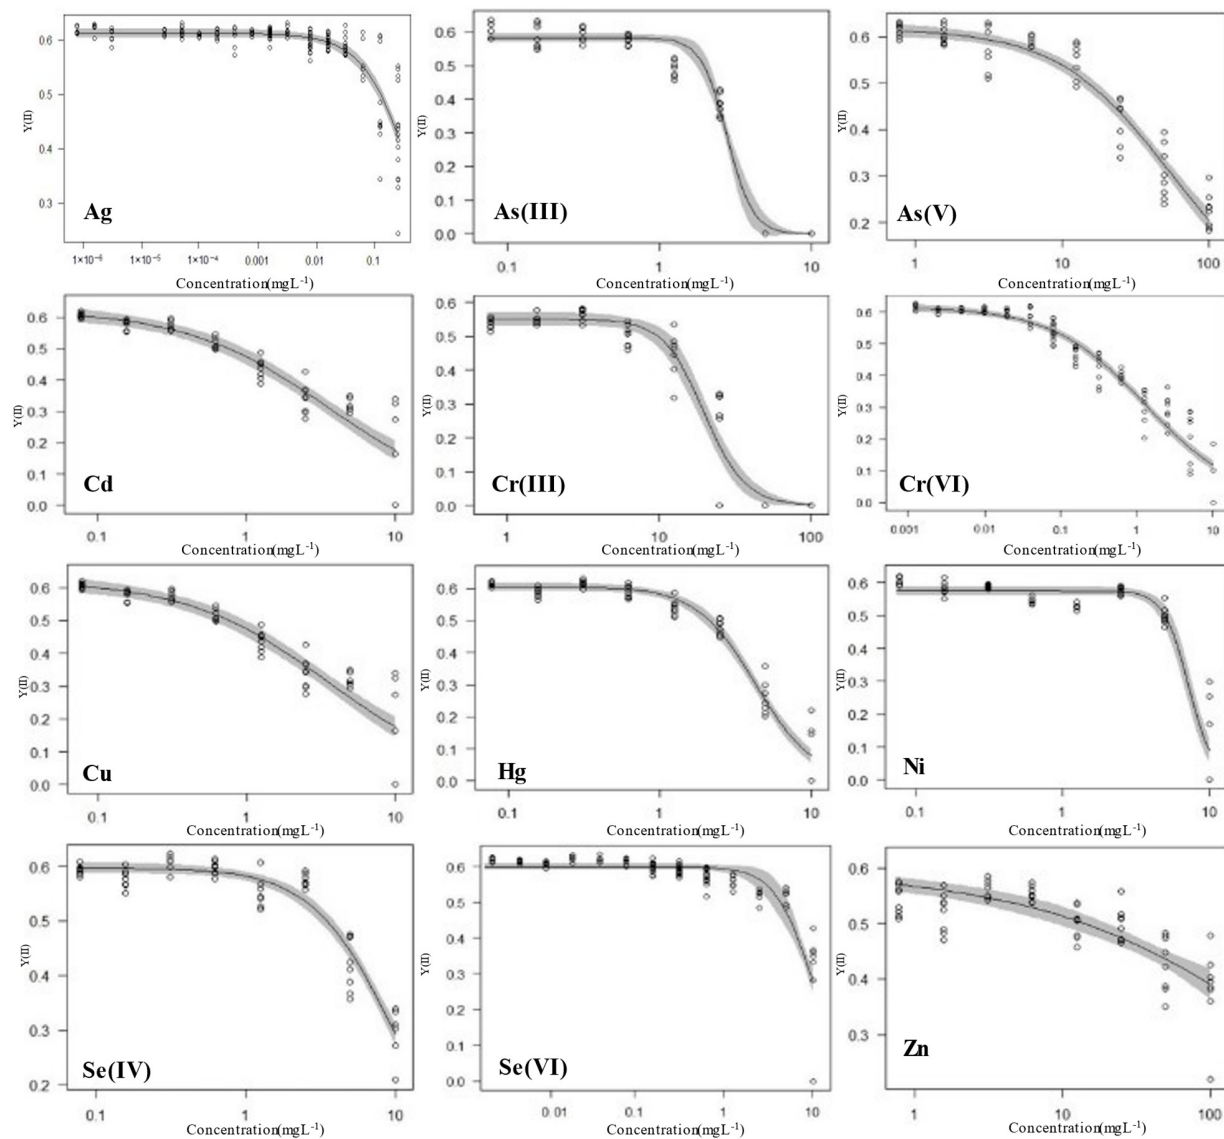

Supplement: s1 [file s1]
