# Supplementary material for: Comparative Phytotoxicity of Metallic Elements on Duckweed Lemna gibba L. Using Growth- and Chlorophyll Fluorescence Induction-Based Endpoints
Source: MDPI journal article supplement (doi:10.3390/plants13020215), 2024-01-12

**Figure S5.** 3-parameter log-logistic concentration-response model fittings of  $RGR_{frond}$  for the tested metals and metalloids. Circles denote individual measurements, solid lines and shaded areas denote the fitted models and the corresponding standard errors of estimates.

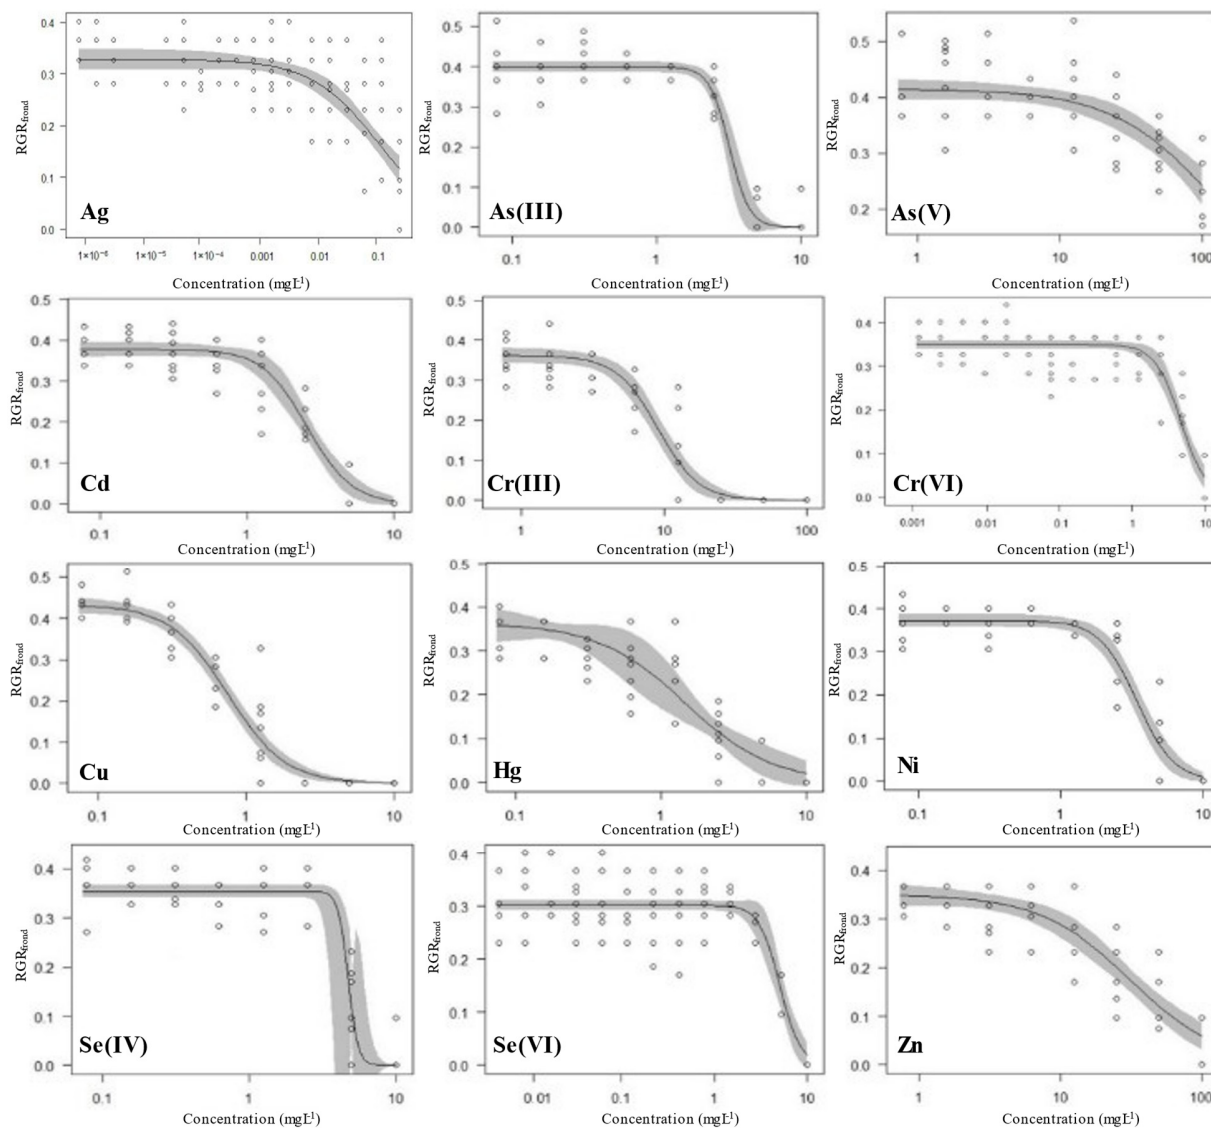

Supplement: s1 [file s1]
