# Supplementary material for: Comparative Phytotoxicity of Metallic Elements on Duckweed Lemna gibba L. Using Growth- and Chlorophyll Fluorescence Induction-Based Endpoints
Source: MDPI journal article supplement (doi:10.3390/plants13020215), 2024-01-12
Supplement: s1 [file s1]

**Table S1.** The results of the 3-parameter log-logistic model fittings (DF – degrees of freedom, RSS - residual sum of squares, F-value, p-value and Pseudo R<sup>2</sup>), and the calculated 20% (EC<sub>20</sub>) and 50% effective concentrations (EC<sub>50</sub>) for frond number- (RGR<sub>frond</sub>) and frond area-based relative growth rates (RGR<sub>area</sub>), dark adapted- (F<sub>v</sub>/F<sub>o</sub>) and light adapted photochemical efficiency (Y(II)) as estimates ± standard errors of estimates.

| Toxicant       | Parameter                      | DF  | RSS  | F-value | p-value | Pseudo R <sup>2</sup> | EC20 (mg L <sup>-1</sup> ±SE) | EC50 (mg L <sup>-1</sup> ±SE) |
|----------------|--------------------------------|-----|------|---------|---------|-----------------------|-------------------------------|-------------------------------|
| <b>Ag</b>      | RGR <sub>frond</sub>           | 169 | 0.69 | 2.62    | <0.005  | 0.76                  | 0.016±0.003                   | 0.11±0.02                     |
|                | RGR <sub>area</sub>            | 169 | 0.26 | 14.94   | <0.001  | 0.92                  | 0.0001±0.00006                | 0.005±0.001                   |
|                | F <sub>v</sub> /F <sub>o</sub> | 169 | 5.27 | 1.18    | 0.300   | 0.71                  | 0.31±0.03*                    | 1.27±0.43*                    |
|                | Y(II)                          | 169 | 0.23 | 0.31    | 0.990   | 0.85                  | 0.14±0.01*                    | 0.55±0.07*                    |
| <b>As(III)</b> | RGR <sub>frond</sub>           | 69  | 0.15 | 0.68    | 0.670   | 0.96                  | 2.59±0.12                     | 3.21±0.17                     |
|                | RGR <sub>area</sub>            | 69  | 0.19 | 2.94    | 0.010   | 0.94                  | 0.90±0.12                     | 1.77±0.15                     |
|                | F <sub>v</sub> /F <sub>o</sub> | 69  | 2.85 | 1.22    | 0.310   | 0.99                  | 0.93±0.05                     | 1.84±0.06                     |
|                | Y(II)                          | 69  | 0.11 | 25.55   | <0.001  | 0.99                  | 2.14±0.10                     | 2.80±0.06                     |
| <b>As(V)</b>   | RGR <sub>frond</sub>           | 69  | 0.20 | 0.40    | 0.880   | 0.73                  | 41.43±8.07                    | 132.18±23.91*                 |
|                | RGR <sub>area</sub>            | 69  | 0.11 | 0.95    | 0.460   | 0.91                  | 24.75±3.02                    | 60.70±4.41                    |
|                | F <sub>v</sub> /F <sub>o</sub> | 69  | 4.50 | 1.08    | 0.380   | 0.93                  | 14.41±1.62                    | 47.15±2.68                    |
|                | Y(II)                          | 69  | 0.10 | 2.55    | 0.030   | 0.96                  | 16.10±1.61                    | 54.33±3.01                    |
| <b>Cd</b>      | RGR <sub>frond</sub>           | 69  | 0.17 | 2.97    | 0.010   | 0.95                  | 1.59±0.22                     | 2.58±0.17                     |
|                | RGR <sub>area</sub>            | 69  | 1.02 | 0.82    | 0.560   | 0.97                  | 0.44±0.04                     | 0.73±0.04                     |
|                | F <sub>v</sub> /F <sub>o</sub> | 69  | 8.12 | 11.05   | <0.001  | 0.96                  | 0.54±0.11                     | 2.45±0.25                     |
|                | Y(II)                          | 69  | 0.25 | 2.47    | 0.030   | 0.93                  | 0.78±0.17                     | 3.59±0.38                     |
| <b>Cr(III)</b> | RGR <sub>frond</sub>           | 69  | 0.17 | 0.66    | 0.680   | 0.96                  | 5.68±0.61                     | 9.02±0.60                     |
|                | RGR <sub>area</sub>            | 69  | 0.05 | 1.05    | 0.400   | 0.98                  | 4.21±0.31                     | 6.22±0.23                     |
|                | F <sub>v</sub> /F <sub>o</sub> | 69  | 8.72 | 6.01    | <0.001  | 0.96                  | 7.52±0.80                     | 12.35±0.74                    |
|                | Y(II)                          | 69  | 0.24 | 1.34    | 0.250   | 0.97                  | 12.92±1.11                    | 19.92±0.99                    |
| <b>Cr(VI)</b>  | RGR <sub>frond</sub>           | 132 | 0.32 | 4.60    | <0.001  | 0.87                  | 2.69±0.36                     | 4.69±0.32                     |
|                | RGR <sub>area</sub>            | 132 | 0.34 | 22.01   | <0.001  | 0.89                  | 0.02±0.002                    | 0.66±0.15                     |
|                | F <sub>v</sub> /F <sub>o</sub> | 132 | 6.98 | 10.01   | <0.001  | 0.98                  | 0.09±0.008                    | 0.42±0.02                     |
|                | Y(II)                          | 132 | 0.27 | 6.87    | <0.001  | 0.97                  | 0.18±0.03                     | 1.28±0.1                      |

|               |                                |     |      |       |        |      |            |                |
|---------------|--------------------------------|-----|------|-------|--------|------|------------|----------------|
| <b>Cu</b>     | RGR <sub>frond</sub>           | 69  | 0.14 | 1.18  | 0.330  | 0.97 | 0.40±0.04  | 0.75±0.04      |
|               | RGR <sub>area</sub>            | 69  | 0.03 | 1.75  | 0.120  | 0.99 | 0.29±0.01  | 0.37±0.01      |
|               | F <sub>v</sub> /F <sub>o</sub> | 69  | 4.36 | 22.54 | <0.001 | 0.98 | 0.45±0.05  | 1.23±0.08      |
|               | Y(II)                          | 69  | 0.21 | 11.42 | <0.001 | 0.97 | 0.90±0.10  | 1.86±0.11      |
| <b>Hg</b>     | RGR <sub>frond</sub>           | 69  | 0.26 | 9.24  | <0.001 | 0.92 | 0.56±0.33  | 1.47±0.38      |
|               | RGR <sub>area</sub>            | 69  | 0.10 | 9.31  | <0.001 | 0.96 | 0.05±0.01  | 0.24±0.03      |
|               | F <sub>v</sub> /F <sub>o</sub> | 69  | 3.72 | 1.58  | 0.170  | 0.97 | 2.60±0.14  | 4.87±0.17      |
|               | Y(II)                          | 69  | 0.11 | 2.05  | 0.070  | 0.98 | 2.32±0.15  | 4.30±0.15      |
| <b>Ni</b>     | RGR <sub>frond</sub>           | 69  | 0.17 | 0.21  | 0.970  | 0.94 | 2.27±0.20  | 3.44±0.20      |
|               | RGR <sub>area</sub>            | 69  | 0.08 | 2.43  | 0.030  | 0.96 | 1.77±0.20  | 3.28±0.20      |
|               | F <sub>v</sub> /F <sub>o</sub> | 69  | 6.36 | 28.93 | <0.001 | 0.94 | 2.73±0.47  | 5.81±0.35      |
|               | Y(II)                          | 69  | 0.16 | 2.80  | 0.010  | 0.95 | 5.51±0.26  | 7.21±0.25      |
| <b>Se(IV)</b> | RGR <sub>frond</sub>           | 69  | 0.16 | 1.00  | 0.430  | 0.93 | 4.27±1.68  | 4.73±0.64      |
|               | RGR <sub>area</sub>            | 69  | 1.36 | 15.4  | <0.001 | 0.90 | 4.01±1.87  | 4.41±1.18      |
|               | F <sub>v</sub> /F <sub>o</sub> | 69  | 4.20 | 0.31  | 0.930  | 0.96 | 4.62±0.17  | 6.48±0.19      |
|               | Y(II)                          | 69  | 0.06 | 6.56  | <0.001 | 0.95 | 4.10±0.25  | 9.73±0.42      |
| <b>Se(VI)</b> | RGR <sub>frond</sub>           | 131 | 0.34 | 2.16  | 0.020  | 0.84 | 3.26±0.47  | 4.78±0.35      |
|               | RGR <sub>area</sub>            | 131 | 0.48 | 12.18 | <0.001 | 0.80 | 0.26±0.15  | 1.73±0.42      |
|               | F <sub>v</sub> /F <sub>o</sub> | 131 | 5.06 | 0.46  | 0.920  | 0.91 | 5.96±0.32  | 10.39±0.34*    |
|               | Y(II)                          | 131 | 0.29 | 3.24  | <0.001 | 0.87 | 4.83±0.59  | 9.40±0.47      |
| <b>Zn</b>     | RGR <sub>frond</sub>           | 69  | 0.21 | 1.76  | 0.120  | 0.89 | 11.28±2.93 | 31.23±3.90     |
|               | RGR <sub>area</sub>            | 69  | 0.10 | 7.37  | <0.001 | 0.93 | 0.27±0.10  | 3.88±0.78      |
|               | F <sub>v</sub> /F <sub>o</sub> | 69  | 4.78 | 13.25 | <0.001 | 0.96 | 24.42±2.41 | 45.31±2.28     |
|               | Y(II)                          | 69  | 0.12 | 4.46  | <0.001 | 0.84 | 24.85±9.53 | 350.56±128.85* |

\* Extrapolated values from the model fittings when the calculated effective concentrations were out of the applied concentration range.
