# Supplementary material for: Comparative Phytotoxicity of Metallic Elements on Duckweed Lemna gibba L. Using Growth- and Chlorophyll Fluorescence Induction-Based Endpoints
Source: Plants (Basel). 2024 Jan 12;13(2):215. doi: 10.3390/plants13020215 (PMC10821045; doi:10.3390/plants13020215)
Supplement: Supplementary file 1 [file plants-13-00215-s001.zip]

Archive with 5 entries (5 files):
- Figure S5-R1 v1.1.pdf
- Figure S6-R1 v1.1.pdf
- Figure S7-R1 v1.1.pdf
- File S1-R1.pdf
- Table S1-R1.pdf
